# Supplementary material for: Radical emulsion polymerization with chain transfer monomer: an approach to branched vinyl polymers with high molecular weight and relatively narrow polydispersity
Source: Royal Society of Chemistry journal article supplement (doi:10.1039/c3py01437a), 2013-11-26
Supplement: c3py01437a.pdf [file c3py01437a.pdf]

## Supporting Information

### Radical Emulsion Polymerization with Chain Transfer Monomer: An Approach to Branched Vinyl Polymers with High Molecular Weight and Relatively Narrow Polydispersity

Qimin Jiang, Wenyan Huang, Hongjun Yang, Xiaoqiang Xue, Bibiao Jiang\*, Dongliang Zhang,  
Jianbo Fang, Jianhai Chen, Yang Yang, Guangqun Zhai, Lizhi Kong, and Jinlong Guo  
*School of Materials Science and Engineering, Changzhou University, Changzhou 213164, China*

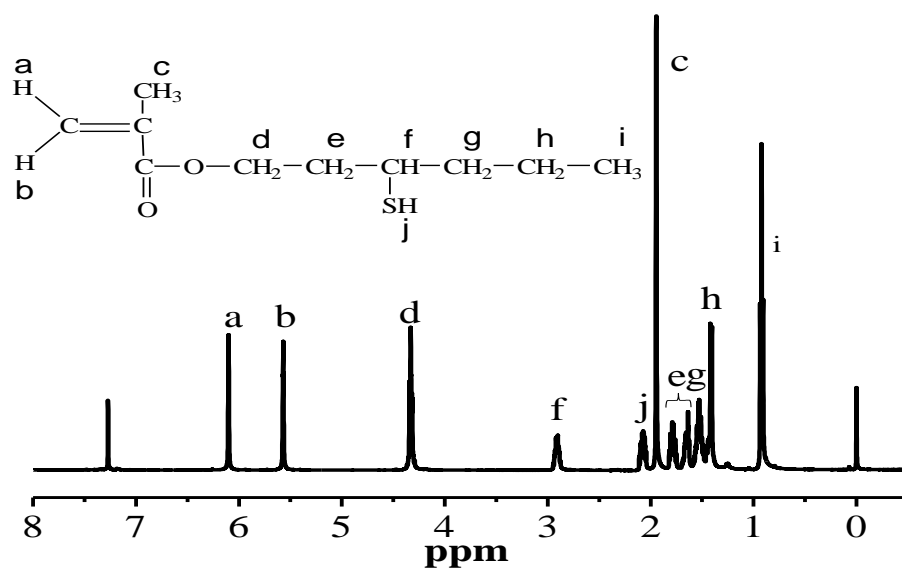

Figure S1. The <sup>1</sup>H NMR spectrum of MHM. The spectrum was obtained at 25 °C with CDCl<sub>3</sub> as the solvent.

\* Corresponding Author, Email: [jiangbibiao@cczu.edu.cn](mailto:jiangbibiao@cczu.edu.cn), Phone:

(86)519-8633-0006, Fax: (86)519-8633-0047

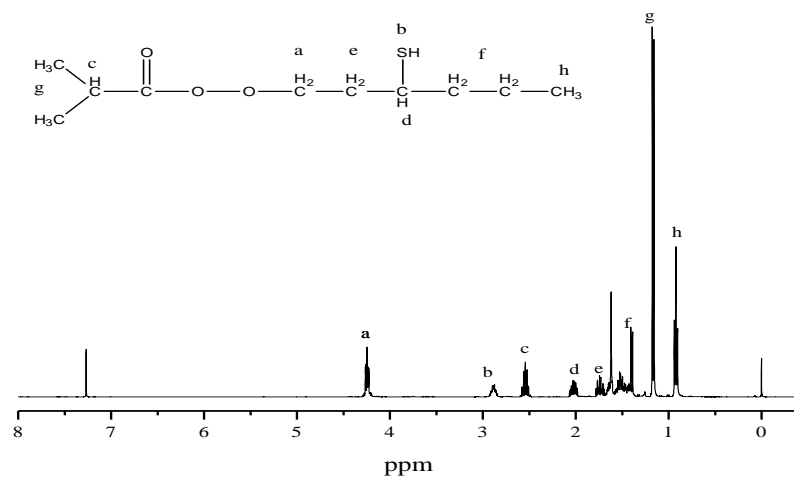

Figure S2. The <sup>1</sup>H NMR spectrum of MHIB. The spectrum was obtained at 25 °C with CDCl<sub>3</sub> as the solvent.

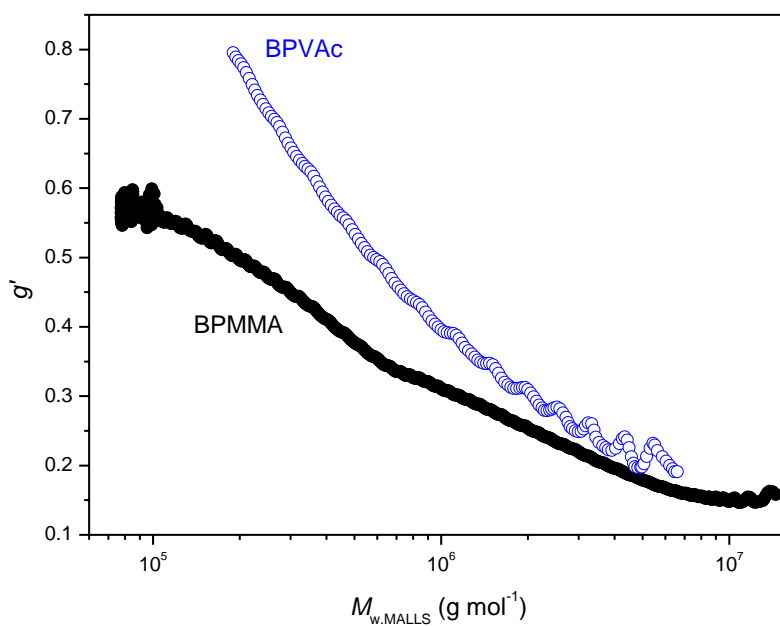

Figure S3. Variation of the Zimm branching factor  $g'$  with molecular weight across the full molecular weight range for BPMMA and BPVAc.

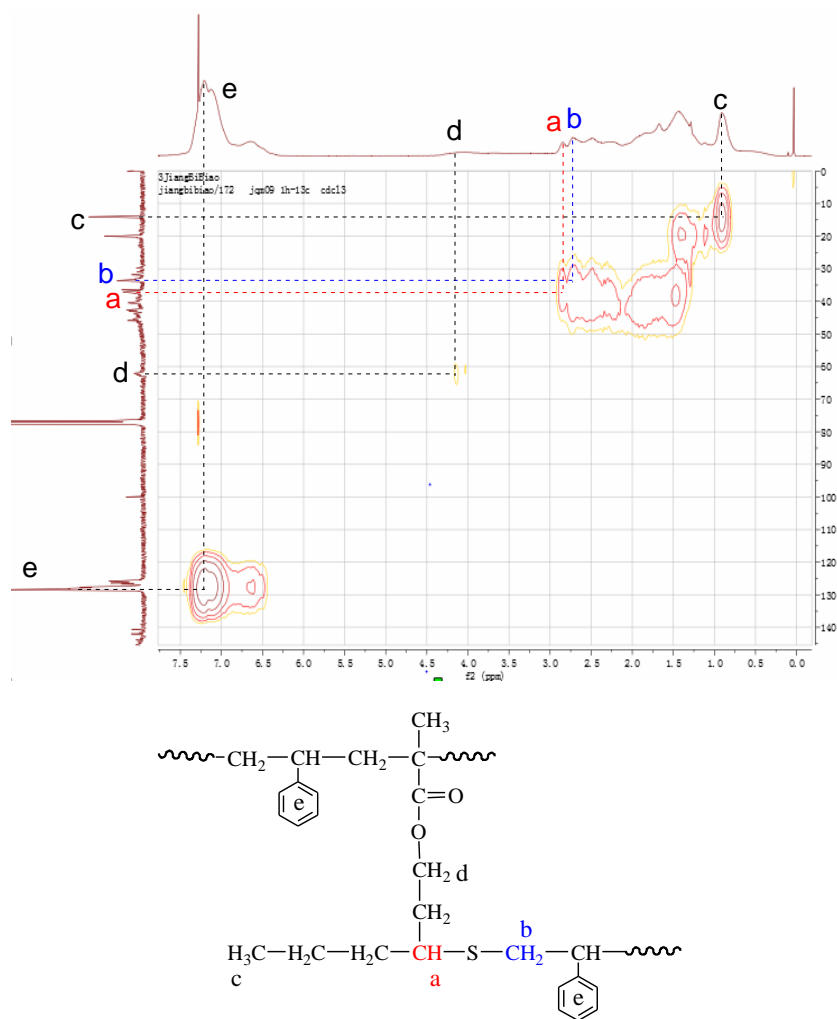

Figure S4. Typical hydrocarbon 2D NMR spectrum of polymers prepared at high MHM feed ratios.

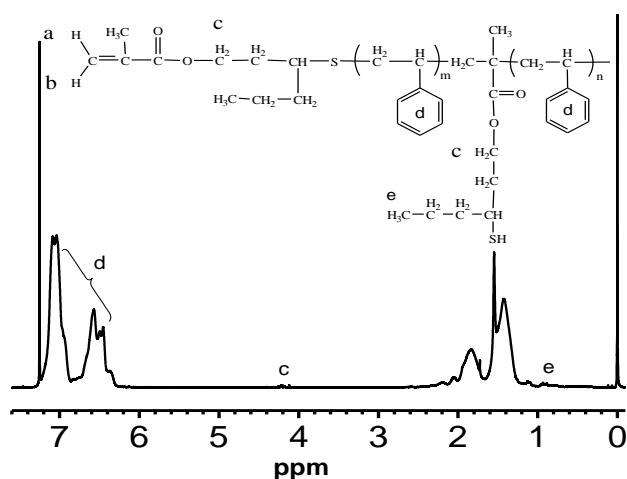

Figure S5.  $^1\text{H}$  NMR spectrum of the polymer BPS-3 at 96.0% styrene conversion.  $M_n=94400 \text{ g mol}^{-1}$ ,  $\text{PDI}=4.46$ . The spectrum was obtained at  $25 \text{ }^\circ\text{C}$  with  $\text{CDCl}_3$  as the solvent.

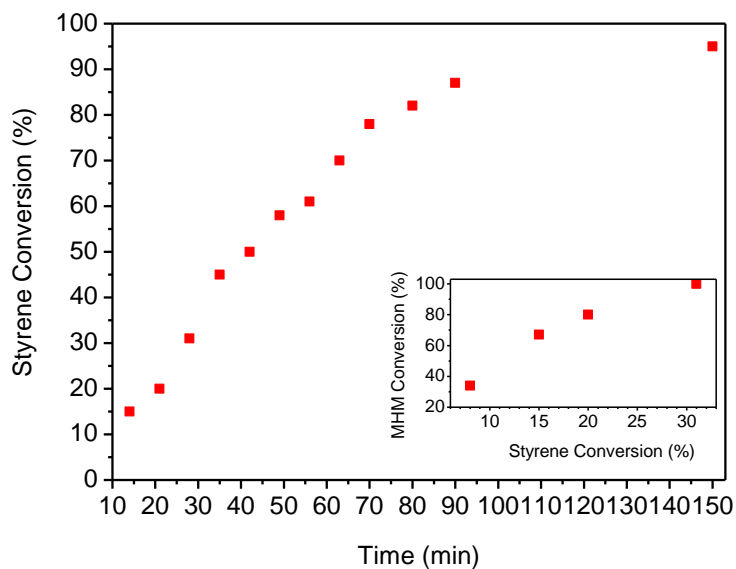

Figure S6. Kinetic data for BPS-6 in emulsion polymerization at 80°C.

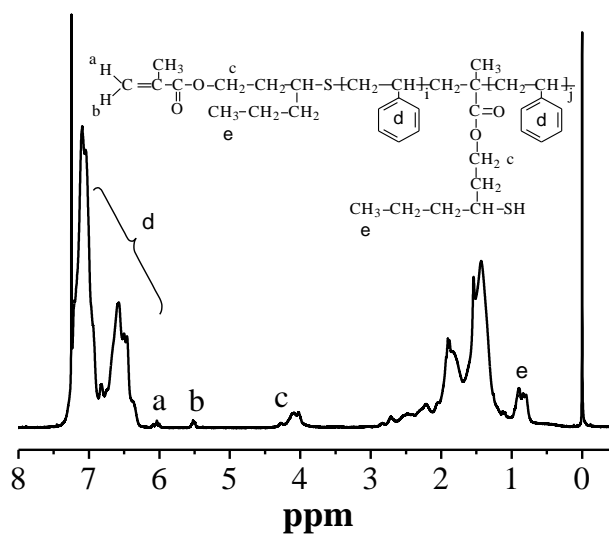

Figure S7. <sup>1</sup>H NMR spectrum of BPS-9 initiated by AIBN in toluene at 80 °C (St<sub>100</sub>-MHM<sub>2.0</sub>-AIBN<sub>1.0</sub>). The number average molecular weight and PDI of this sample were 2000 g mol<sup>-1</sup> and 1.92, respectively. The spectrum was obtained at 25 °C with CDCl<sub>3</sub> as the solvent.

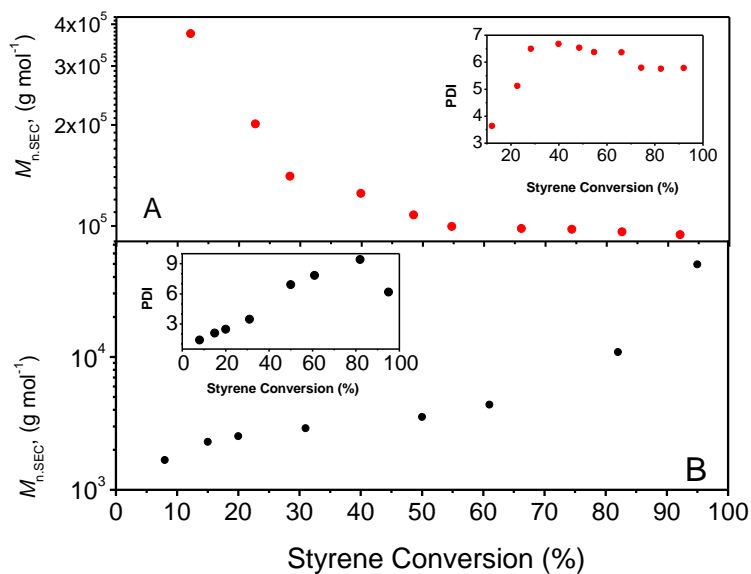

Figure S8. Changes of  $M_{n,SEC}$  and PDI with styrene conversion at 80°C.

A: LPS-1, St<sub>100</sub>-PPS<sub>1.0</sub> in emulsion,

B: BPS-6, St<sub>100</sub>-MHM<sub>2.0</sub>-PPS<sub>1.0</sub> in emulsion.

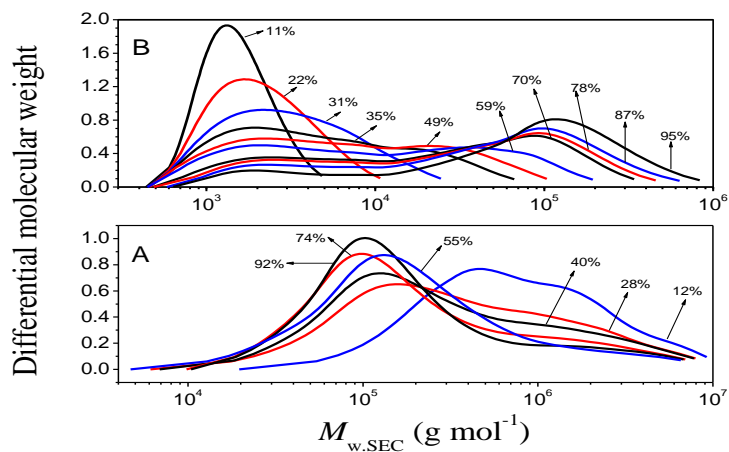

Figure S9. Evolution of the differential molecular weight distribution for the polymerization of styrene with (A) and without (B) MHIB in emulsion at 80°C.

A: LPS-1, St<sub>100</sub>-PPS<sub>1.0</sub> in emulsion,

B: LPS-2, St<sub>100</sub>-MHIB<sub>2.0</sub>-PPS<sub>1.0</sub> in emulsion.

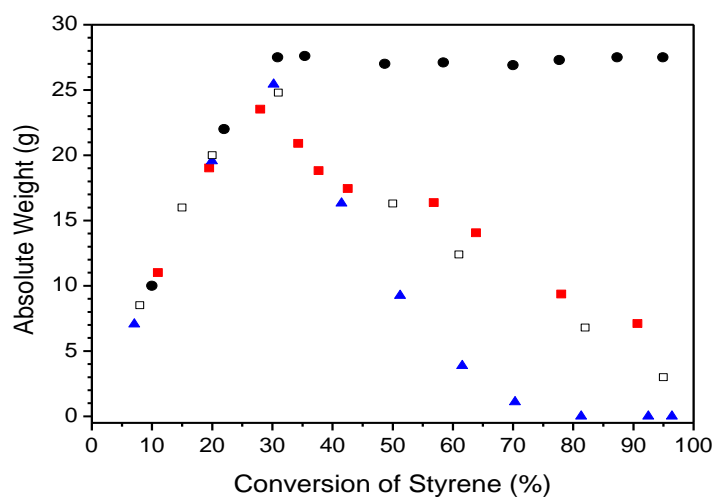

Figure S10. Variation of the absolute weight of the residual primary chain with conversion for the polymerization of styrene at 80°C.

- : LPS-2, St<sub>100</sub>-MHIB<sub>2.0</sub>-PPS<sub>1.0</sub> in emulsion,
- ▲: BPS-3, St<sub>100</sub>-MHM<sub>2.0</sub>-PPS<sub>1.0</sub> in emulsion,
- : BPS-6, St<sub>100</sub>-MHM<sub>2.0</sub>-PPS<sub>1.0</sub> in emulsion,
- : BPS-9, St<sub>100</sub>-MHM<sub>2.0</sub>-AIBN in solution.

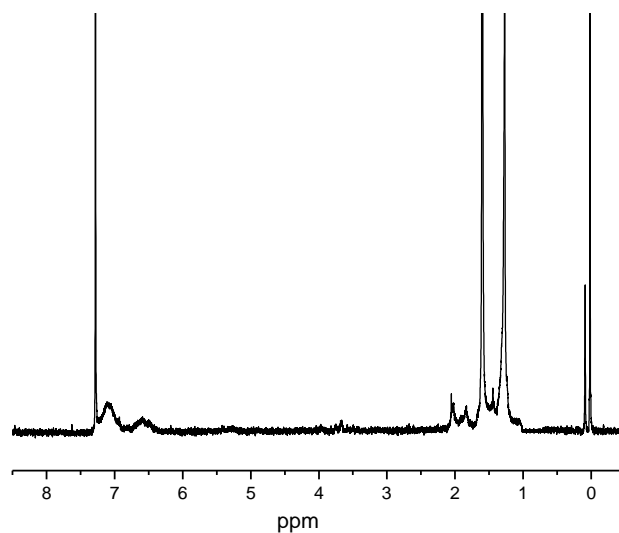

Figure S11. <sup>1</sup>H NMR spectrum of the separated primary chain from St<sub>100</sub>-MHM<sub>2.0</sub>-PPS<sub>1.0</sub> in emulsion (BPS-6) at 95% styrene conversion.  $M_n=3400$  g mol<sup>-1</sup>, PDI=2.31. The spectrum was obtained at 25 °C with CDCl<sub>3</sub> as the solvent.
